# Supplementary material for: New platform for simple and rapid protein-based affinity reactions
Source: PubMed Central journal article supplement (PMC5428043; doi:10.1038/s41598-017-00264-y), 2017-03-14
Supplement: 41598_2017_264_MOESM1_ESM.pdf [file 41598_2017_264_MOESM1_ESM.pdf]

## Supplementary Information

### **New platform for simple and rapid protein-based affinity reactions**

Kei Kubota, Takuya Kubo, Tetsuya Tanigawa, Toyohiro Naito & Koji Otsuka

#### **Materials**

Poly(ethylene-co-glycidyl methacrylate) (Sigma Aldrich), pentaerythritol (Toso), recombinant human IgG1 antibody (Daiichi-Sankyo), bovine serum albumin (BSA) (Sigma Aldrich), IgG1, kappa from human myeloma plasma (Sigma Aldrich), IgG2, kappa from human myeloma plasma (Sigma Aldrich), pierce recombinant Protein A (Life Technologies), PBS Tablets (TaKaRa), acetonitrile, HPLC grade (Wako Pure Chemical Industries), acetonitrile, LC-MS grade (Wako Pure Chemical Industries), sodium dihydrogenphosphate dihydrate (Wako Pure Chemical Industries), sodium chloride (Wako Pure Chemical Industries), 2 mol/L sodium hydroxide (Wako Pure Chemical Industries), 2 mol/L hydrochloric acid (Wako Pure Chemical Industries), Pepsin from porcine gastric mucosa (Sigma Aldrich), acetic acid (Wako Pure Chemical Industries), tris(hydroxymethyl)aminomethane (Wako Pure Chemical Industries), formic acid (Wako Pure Chemical Industries), trifluoroacetic acid (TFA) (Wako Pure Chemical Industries). Pure water was obtained from Milli-Q Gradient A10 (Merck Millipore).

#### **Instruments**

Scanning electron microscope, TM-1000 (Hitachi High-Technologies). LC analyses for IgG with PDA were operated by a LC system, LC-20 Prominence (Shimadzu Co.). LC-MS analyses for IgG were operated by a LC system, LC-20 Prominence XR (Shimadzu Co.), a mass spectrometer, Q-TOF premier (Waters Co.), and a protein analysis soft, MassLynx V4.1 (Waters Co.). LC-MS analyses for the digestion with Pepsin were operated by a LC system, LC1100 or LC 1200 (Agilent Technologies), a mass spectrometer, LTQ/XL Orbitrap (Thermo Fisher Scientific), and a peptide mapping soft, PepFinder 2.0 (Thermo Fisher Scientific).

MS conditions with a Q-TOF premier were follows: capillary, 3.5 kV; sampling cone, 80.0 V; source temperature, 100 °C; cone gas flow, 50.0 (L/Hr), and with a LTQ/XL Orbitrap were follows: spray voltage, 4 kV; capillary temperature, 325 °C; capillary voltage, 10 V.

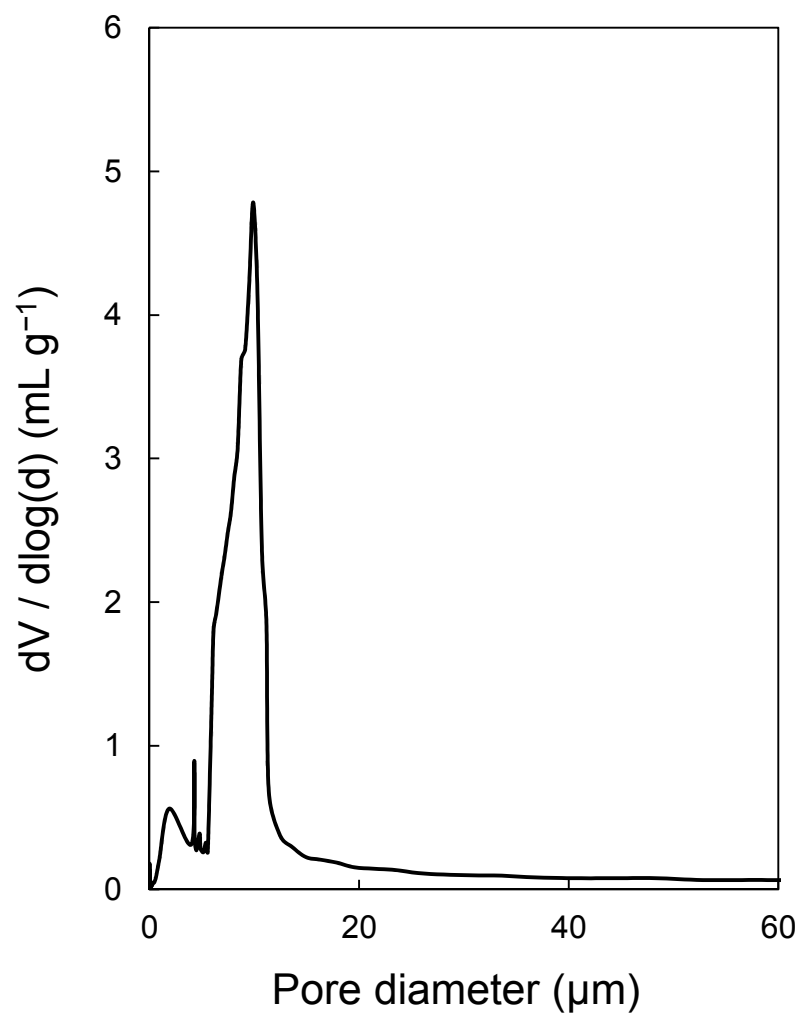

Supplementary Fig. 1. Pore distribution of a PEGM-based spongy monolith by mercury porosimetry.

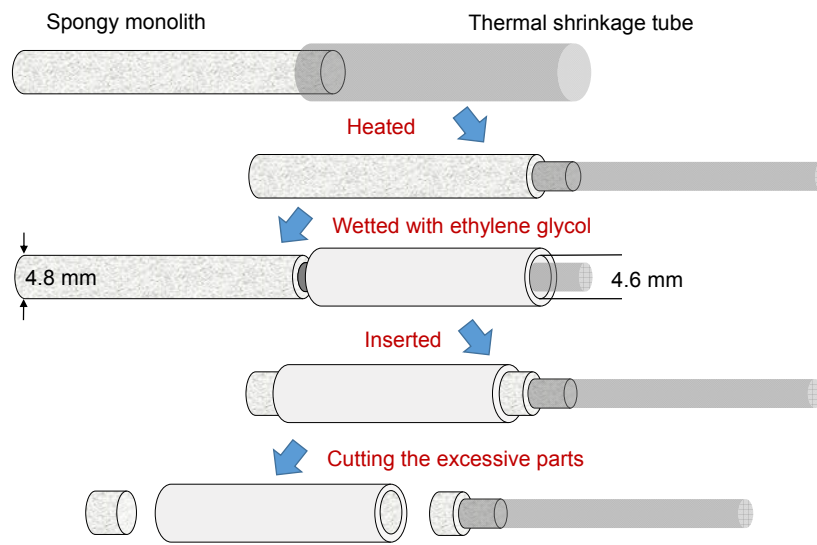

Supplementary Fig. 2. Schematics of the packing procedures of spongy monoliths.

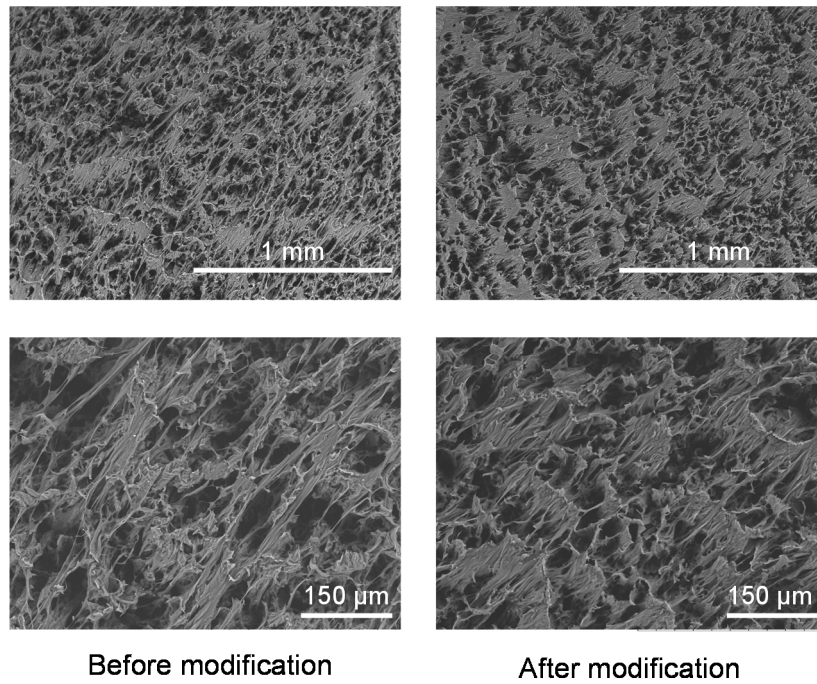

Supplementary Fig. 3. SEM images of the spongy monolith before and after immobilization with Protein A.

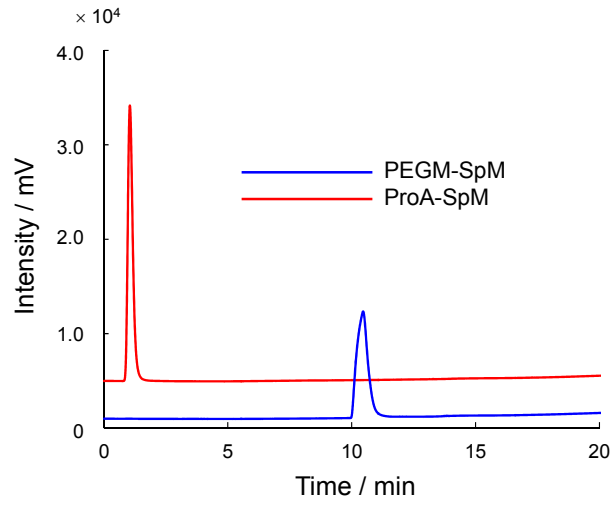

Supplementary Fig. 4. Chromatograms of BSA with PEGM-SpM or ProA-SpM.

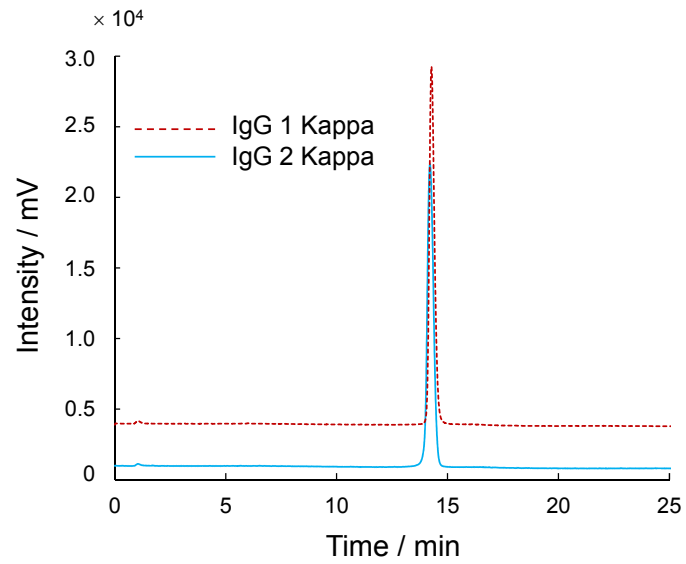

Supplementary Fig. 5. Chromatograms of IgG standards with ProA-SpM by pH gradient.

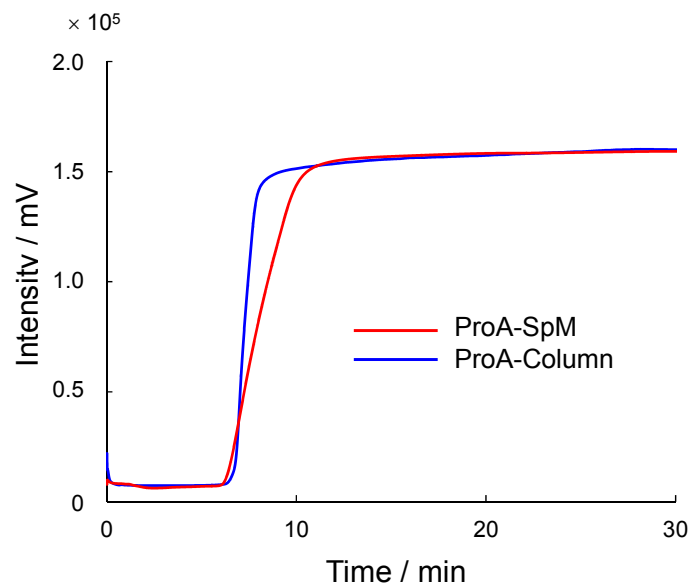

Supplementary Fig. 6. Frontal analyses using IgG standard with ProA-Column and ProA-SpM.

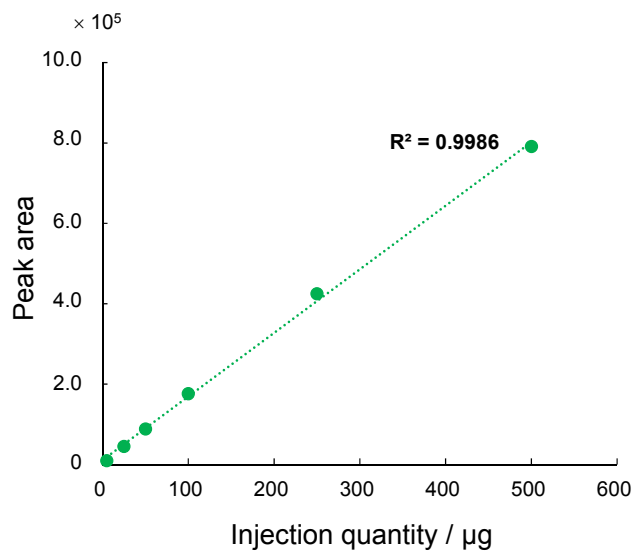

Supplementary Fig. 7. Linearity of injected IgG under rapid elution,  $9.0 \text{ mL min}^{-1}$ .

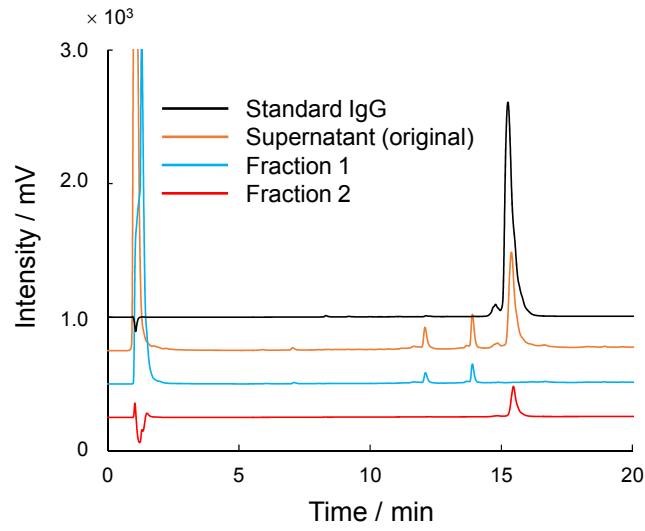

Supplementary Fig. 8. The UV chromatograms of a Protein A load sample.

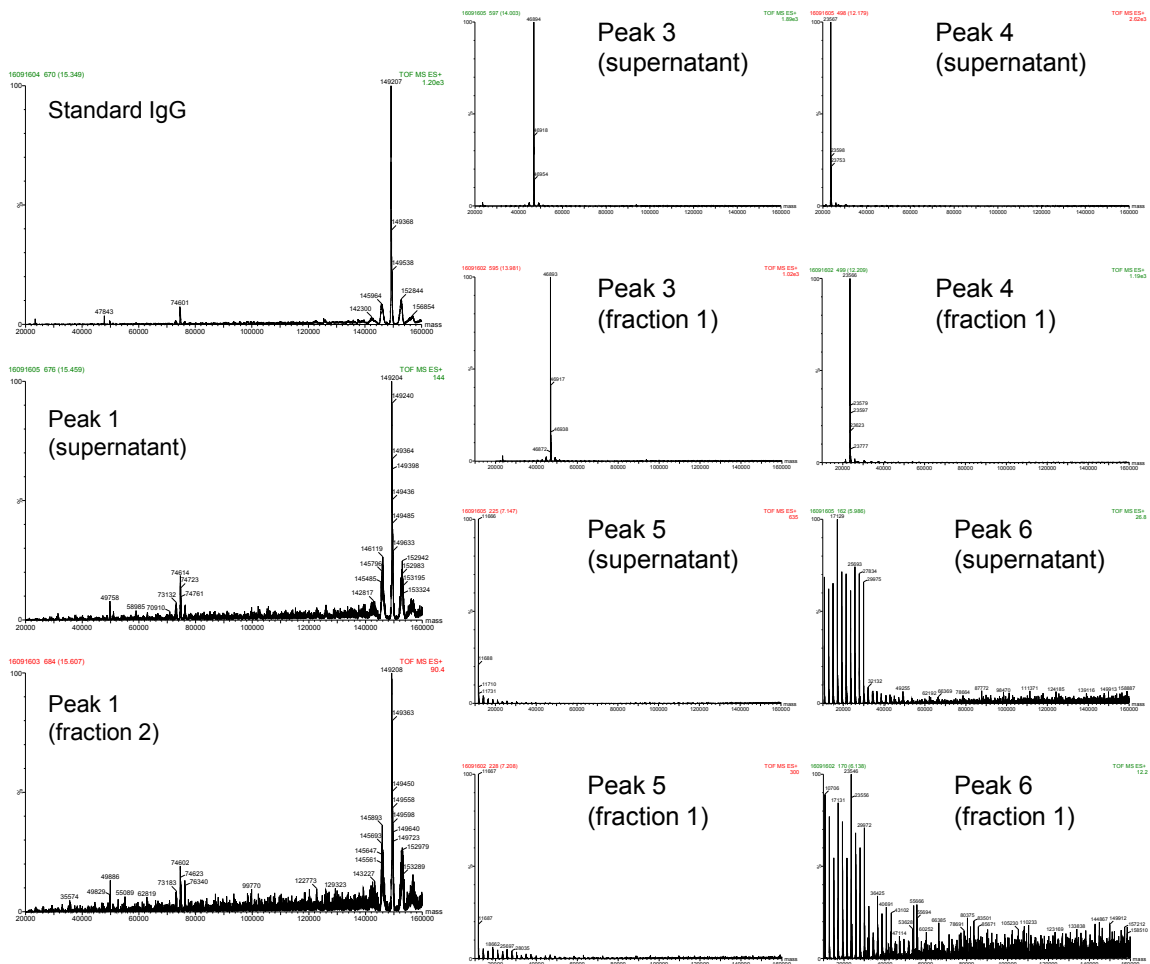

Supplementary Fig. 9. MS spectra of each peak by detected from a recombinant human IgG1 antibody. The peaks are corresponding to Fig. 1(k).

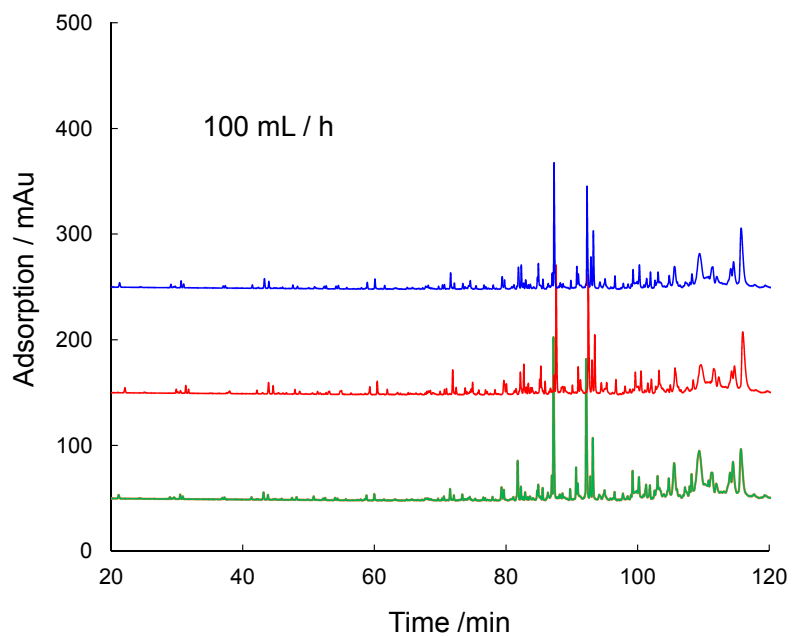

Supplementary Fig. 10. The UV chromatograms for repeatability of online digestion with Pep-SpM under 100 mL h<sup>-1</sup> as flow rate.

Supplementary Table 1. Assigned peptides by online digestion of a recombinant human IgG1 antibody with Pep-SpM. These peptides were assigned by PepFinder 2.0. based on all the peptides detected by LC-MS containing the origin (light or heavy chain). The number of amino acids of each terminal and the length are summarized. Here, the number of amino acid was assigned that the number 1 is first amino acid from N-terminal.

| Flow Rate 100 mL h <sup>-1</sup> |                    |            |     |            |     |        | Flow Rate 10 mL h <sup>-1</sup> |                    |            |     |            |     |        |
|----------------------------------|--------------------|------------|-----|------------|-----|--------|---------------------------------|--------------------|------------|-----|------------|-----|--------|
| Retention Time (min)             | Identified peptide |            |     |            |     |        | Retention Time (min)            | Identified peptide |            |     |            |     |        |
|                                  | Chain              | N-terminal |     | C-terminal |     | Length |                                 | Chain              | N-terminal |     | C-terminal |     | Length |
| 16.2563                          | L                  | Y          | 87  | Q          | 90  | 4      | 16.2486                         | L                  | Y          | 87  | Q          | 90  | 4      |
| 25.186                           | L                  | K          | 125 | V          | 131 | 7      | 25.1773                         | L                  | K          | 125 | V          | 131 | 7      |
| 25.4079                          | H                  | Q          | 177 | L          | 181 | 5      | 25.3485                         | H                  | Q          | 177 | L          | 181 | 5      |
| 30.0255                          | L                  | Y          | 91  | Y          | 94  | 4      | 26.2261                         | L                  | S          | 161 | T          | 171 | 11     |
| 30.2895                          | L                  | F          | 83  | T          | 85  | 3      | 30.024                          | L                  | Y          | 91  | Y          | 94  | 4      |
| 30.6824                          | H                  | D          | 401 | F          | 406 | 6      | 30.2692                         | L                  | F          | 83  | T          | 85  | 3      |
| 31.4681                          | L                  | Y          | 87  | S          | 93  | 7      | 30.625                          | H                  | D          | 401 | F          | 406 | 6      |
| 31.884                           | L                  | Y          | 86  | Q          | 90  | 5      | 31.4988                         | L                  | Y          | 87  | S          | 93  | 7      |
| 35.2608                          | H                  | I          | 379 | E          | 382 | 4      | 31.8938                         | L                  | Y          | 86  | Q          | 90  | 5      |
| 37.6997                          | L                  | T          | 5   | L          | 11  | 7      | 35.2807                         | H                  | I          | 379 | E          | 382 | 4      |
| 37.7475                          | L                  | K          | 148 | E          | 160 | 13     | 37.7173                         | L                  | T          | 5   | L          | 11  | 7      |
| 38.1499                          | L                  | A          | 84  | Q          | 90  | 7      | 37.9938                         | L                  | A          | 84  | Y          | 87  | 4      |
| 42.2943                          | L                  | Y          | 86  | S          | 93  | 8      | 38.3718                         | H                  | Y          | 182 | S          | 186 | 5      |
| 43.1654                          | L                  | D          | 1   | M          | 4   | 4      | 39.3537                         | L                  | Q          | 123 | V          | 131 | 9      |
| 44.0371                          | L                  | F          | 83  | Y          | 86  | 4      | 41.7937                         | H                  | I          | 255 | T          | 262 | 8      |



|         |   |   |     |   |     |    |         |   |   |     |   |     |    |
|---------|---|---|-----|---|-----|----|---------|---|---|-----|---|-----|----|
| 44.7465 | L | Y | 87  | Y | 94  | 8  | 42.3163 | L | Y | 86  | S | 93  | 8  |
| 45.4826 | L | V | 132 | L | 134 | 3  | 43.8953 | L | I | 75  | D | 82  | 8  |
| 45.5874 | H | V | 264 | D | 272 | 9  | 44.0758 | L | F | 83  | Y | 86  | 4  |
| 48.0523 | L | Y | 36  | L | 46  | 11 | 44.4621 | H | V | 5   | S | 17  | 13 |
| 48.7965 | H | I | 255 | C | 263 | 9  | 44.487  | H | T | 69  | L | 79  | 11 |
| 50.6965 | L | L | 47  | Y | 49  | 3  | 44.7377 | H | Y | 94  | M | 103 | 10 |
| 51.5222 | H | V | 371 | D | 378 | 8  | 44.7598 | L | Y | 87  | Y | 94  | 8  |
| 52.798  | L | T | 179 | E | 194 | 16 | 45.4787 | L | V | 132 | L | 134 | 3  |
| 53.3235 | L | F | 83  | Q | 90  | 8  | 45.6127 | H | V | 264 | D | 272 | 9  |
| 54.9483 | L | F | 83  | Y | 87  | 5  | 46.1097 | H | E | 1   | L | 4   | 4  |
| 55.1311 | L | L | 135 | E | 142 | 8  | 46.2323 | H | N | 84  | V | 93  | 10 |
| 58.0703 | H | I | 255 | V | 264 | 10 | 46.2734 | L | S | 181 | E | 194 | 14 |
| 59.2466 | H | L | 370 | D | 378 | 9  | 48.0088 | L | Y | 36  | L | 46  | 11 |
| 59.4285 | L | D | 1   | L | 11  | 11 | 48.2478 | L | T | 74  | D | 82  | 9  |
| 60.5378 | L | V | 195 | C | 213 | 19 | 48.6997 | H | I | 255 | C | 263 | 9  |
| 62.1063 | L | A | 143 | E | 160 | 18 | 48.8763 | L | S | 161 | T | 177 | 17 |
| 62.1547 | L | K | 24  | W | 35  | 12 | 50.722  | L | L | 47  | Y | 49  | 3  |
| 62.5981 | L | D | 1   | D | 17  | 17 | 51.4312 | H | V | 371 | D | 378 | 8  |
| 63.453  | L | K | 125 | L | 134 | 10 | 51.8283 | L | S | 12  | T | 22  | 11 |
| 63.6346 | H | V | 429 | G | 448 | 20 | 51.8554 | L | A | 143 | W | 147 | 5  |
| 64.09   | H | T | 413 | F | 425 | 13 | 52.3511 | H | E | 359 | L | 367 | 9  |
| 64.5711 | L | S | 161 | L | 178 | 18 | 52.6215 | H | E | 1   | L | 4   | 4  |

|         |   |   |     |   |     |    |         |   |   |     |   |     |    |
|---------|---|---|-----|---|-----|----|---------|---|---|-----|---|-----|----|
| 65.308  | L | R | 95  | V | 114 | 20 | 52.769  | L | T | 179 | E | 194 | 16 |
| 67.1361 | L | T | 72  | D | 82  | 11 | 52.9656 | H | V | 188 | T | 199 | 12 |
| 67.854  | L | V | 33  | L | 46  | 14 | 54.1503 | L | F | 71  | T | 74  | 4  |
| 68.1168 | L | Y | 94  | V | 114 | 21 | 55.0588 | L | W | 50  | D | 70  | 21 |
| 68.4145 | H | W | 383 | L | 400 | 18 | 55.0588 | H | M | 254 | C | 263 | 10 |
| 68.6245 | L | S | 181 | C | 213 | 33 | 55.2225 | H | Y | 182 | V | 187 | 6  |
| 69.0118 | H | F | 407 | L | 412 | 6  | 55.496  | L | V | 131 | L | 134 | 4  |
| 70.125  | L | Y | 91  | V | 114 | 24 | 56.5512 | H | V | 187 | T | 199 | 13 |
| 70.7921 | L | T | 179 | C | 213 | 35 | 58.0617 | H | I | 379 | N | 392 | 14 |
| 71.1183 | H | S | 426 | G | 448 | 23 | 58.0617 | H | I | 255 | V | 264 | 10 |
| 71.6    | H | V | 371 | E | 382 | 12 | 58.8873 | L | S | 12  | C | 23  | 12 |
| 72.026  | L | L | 47  | D | 70  | 24 | 59.2177 | H | L | 370 | D | 378 | 9  |
| 72.2769 | L | K | 24  | L | 46  | 23 | 59.3608 | H | H | 431 | G | 448 | 18 |
| 72.6228 | L | Y | 87  | V | 114 | 28 | 59.3608 | L | D | 1   | L | 11  | 11 |
| 73.8955 | H | W | 383 | F | 406 | 24 | 60.5088 | L | V | 195 | C | 213 | 19 |
| 73.9915 | L | C | 23  | L | 46  | 24 | 60.7397 | L | L | 178 | E | 194 | 17 |
| 74.2131 | L | L | 178 | C | 213 | 36 | 61.4625 | L | E | 194 | C | 213 | 20 |
| 74.6945 | L | R | 95  | F | 115 | 21 | 61.6085 | H | V | 429 | K | 449 | 21 |
| 74.8552 | L | D | 1   | T | 22  | 22 | 62.0635 | L | A | 143 | E | 160 | 18 |
| 74.8943 | L | Y | 86  | V | 114 | 29 | 63.689  | H | V | 429 | G | 448 | 20 |
| 75.0746 | L | L | 135 | E | 160 | 26 | 63.689  | L | C | 23  | W | 35  | 13 |
| 75.848  | L | A | 84  | V | 114 | 31 | 64.0969 | H | T | 413 | F | 425 | 13 |

|         |   |   |     |   |     |    |         |   |   |     |   |     |    |
|---------|---|---|-----|---|-----|----|---------|---|---|-----|---|-----|----|
| 75.989  | L | S | 161 | E | 194 | 34 | 64.2954 | H | L | 237 | F | 243 | 7  |
| 77.028  | L | Y | 94  | F | 115 | 22 | 64.5605 | L | S | 161 | L | 178 | 18 |
| 77.2946 | H | Y | 182 | T | 199 | 18 | 64.9275 | H | T | 413 | S | 428 | 16 |
| 78.4786 | L | Y | 91  | F | 115 | 25 | 65.261  | L | R | 95  | V | 114 | 20 |
| 79.0127 | L | D | 1   | C | 23  | 23 | 65.5468 | H | E | 1   | S | 17  | 17 |
| 79.8161 | H | I | 379 | L | 400 | 22 | 65.5468 | H | T | 309 | E | 320 | 12 |
| 79.9533 | L | L | 47  | F | 71  | 25 | 66.9422 | H | V | 371 | A | 380 | 10 |
| 80.2163 | L | Y | 87  | F | 115 | 29 | 67.0433 | L | T | 72  | D | 82  | 11 |
| 81.6356 | L | F | 71  | D | 82  | 12 | 67.0433 | H | V | 148 | T | 157 | 10 |
| 81.7403 | L | V | 132 | E | 142 | 11 | 67.1793 | H | S | 428 | G | 448 | 21 |
| 82.128  | L | Y | 86  | F | 115 | 30 | 67.8288 | L | V | 33  | L | 46  | 14 |
| 82.358  | H | I | 379 | F | 406 | 28 | 68.0648 | L | Y | 94  | V | 114 | 21 |
| 82.8493 | L | S | 161 | C | 213 | 53 | 68.3037 | H | W | 383 | L | 400 | 18 |
| 83.4791 | L | S | 170 | C | 213 | 44 | 68.591  | L | S | 181 | C | 213 | 33 |
| 83.5848 | L | T | 72  | F | 83  | 12 | 68.591  | L | A | 32  | L | 46  | 15 |
| 83.5848 | L | S | 12  | L | 46  | 35 | 68.9706 | H | F | 407 | L | 412 | 6  |
| 83.813  | H | F | 407 | F | 425 | 19 | 69.0472 | H | S | 426 | K | 449 | 24 |
| 84.1388 | L | Y | 36  | D | 70  | 35 | 69.1245 | H | T | 368 | D | 378 | 11 |
| 84.656  | L | L | 47  | T | 74  | 28 | 69.2903 | H | Y | 200 | L | 236 | 37 |
| 85.5998 | L | W | 50  | D | 82  | 33 | 69.697  | H | Y | 393 | F | 406 | 14 |
| 85.8136 | H | Y | 409 | K | 449 | 41 | 70.0908 | L | Y | 91  | V | 114 | 24 |
| 86.1053 | H | T | 413 | G | 448 | 36 | 70.7877 | L | T | 179 | C | 213 | 35 |

|         |   |   |     |   |     |    |         |   |   |     |   |     |    |
|---------|---|---|-----|---|-----|----|---------|---|---|-----|---|-----|----|
| 86.6843 | L | F | 83  | F | 115 | 33 | 71.0471 | H | S | 426 | G | 448 | 23 |
| 87.4643 | H | Y | 409 | G | 448 | 40 | 71.4985 | H | Y | 409 | F | 425 | 17 |
| 88.6947 | L | V | 132 | E | 160 | 29 | 71.6321 | H | V | 371 | E | 382 | 12 |
| 89.3583 | L | R | 95  | V | 131 | 37 | 71.8381 | H | L | 147 | T | 157 | 11 |
| 90.4489 | L | Y | 94  | V | 131 | 38 | 71.9752 | L | L | 47  | D | 70  | 24 |
| 90.8482 | L | Y | 91  | V | 131 | 41 | 72.4119 | H | E | 359 | L | 370 | 12 |
| 91.0745 | H | F | 407 | K | 449 | 43 | 72.6163 | L | Y | 87  | V | 114 | 28 |
| 91.4385 | L | D | 1   | L | 46  | 46 | 72.6163 | H | I | 104 | L | 114 | 11 |
| 91.6291 | L | Y | 87  | V | 131 | 45 | 72.7808 | H | V | 381 | L | 400 | 20 |
| 92.645  | L | F | 83  | L | 124 | 42 | 73.914  | H | W | 383 | F | 406 | 24 |
| 92.645  | H | V | 371 | F | 406 | 36 | 73.9905 | L | C | 23  | L | 46  | 24 |
| 93.2428 | L | L | 47  | D | 82  | 36 | 74.2305 | L | L | 178 | C | 213 | 36 |
| 94.6313 | L | W | 50  | F | 83  | 34 | 74.6902 | L | R | 95  | F | 115 | 21 |
| 94.6313 | L | F | 71  | F | 83  | 13 | 74.8489 | L | L | 135 | W | 147 | 13 |
| 94.6313 | H | V | 158 | L | 176 | 19 | 74.8985 | L | Y | 86  | V | 114 | 29 |
| 95.4596 | L | S | 12  | D | 70  | 59 | 74.8985 | L | D | 1   | T | 22  | 22 |
| 96.3011 | L | W | 50  | Y | 86  | 37 | 75.8386 | L | Y | 172 | E | 194 | 23 |
| 96.7856 | L | F | 71  | Y | 86  | 16 | 75.8798 | L | A | 84  | V | 114 | 31 |
| 96.8625 | L | Y | 36  | D | 82  | 47 | 76.0312 | L | S | 161 | E | 194 | 34 |
| 98.8544 | L | R | 95  | L | 134 | 40 | 76.3668 | H | L | 370 | E | 382 | 13 |
| 99.4037 | L | L | 47  | T | 85  | 39 | 76.4683 | H | E | 1   | L | 18  | 18 |
| 99.5636 | L | Y | 94  | L | 134 | 41 | 77.0042 | L | Y | 94  | F | 115 | 22 |

|         |   |   |     |   |     |    |         |   |   |     |   |     |    |
|---------|---|---|-----|---|-----|----|---------|---|---|-----|---|-----|----|
| 99.7238 | L | Y | 91  | L | 134 | 44 | 77.0748 | H | D | 401 | L | 408 | 8  |
| 100.019 | L | Y | 87  | L | 134 | 48 | 77.1763 | H | T | 166 | L | 176 | 11 |
| 100.229 | H | Y | 200 | M | 254 | 55 | 77.279  | H | Y | 182 | T | 199 | 18 |
| 100.66  | L | L | 47  | F | 83  | 37 | 77.279  | H | P | 191 | T | 199 | 9  |
| 101.745 | L | L | 47  | Y | 86  | 40 | 77.6782 | L | S | 161 | L | 180 | 20 |
| 102.219 | L | Y | 36  | F | 83  | 48 | 77.7542 | L | L | 135 | T | 177 | 43 |
| 102.878 | L | Y | 36  | Y | 86  | 51 | 78.4331 | L | Y | 91  | F | 115 | 25 |
| 104.821 | H | V | 148 | L | 176 | 29 | 78.498  | H | Y | 200 | V | 242 | 43 |
|         |   |   |     |   |     |    | 78.6612 | L | L | 47  | F | 62  | 16 |
|         |   |   |     |   |     |    | 79.0015 | L | D | 1   | C | 23  | 23 |
|         |   |   |     |   |     |    | 79.1568 | H | T | 309 | E | 335 | 27 |
|         |   |   |     |   |     |    | 79.2615 | H | V | 115 | L | 144 | 30 |
|         |   |   |     |   |     |    | 79.5169 | H | V | 115 | C | 146 | 32 |
|         |   |   |     |   |     |    | 79.8138 | H | I | 379 | L | 400 | 22 |
|         |   |   |     |   |     |    | 79.9655 | L | L | 47  | F | 71  | 25 |
|         |   |   |     |   |     |    | 80.2291 | L | Y | 87  | F | 115 | 29 |
|         |   |   |     |   |     |    | 80.8587 | H | T | 309 | V | 350 | 42 |
|         |   |   |     |   |     |    | 81.2565 | H | Y | 182 | Y | 200 | 19 |
|         |   |   |     |   |     |    | 81.4668 | H | V | 264 | W | 279 | 16 |
|         |   |   |     |   |     |    | 81.549  | H | Y | 182 | L | 195 | 14 |
|         |   |   |     |   |     |    | 81.7878 | L | V | 132 | E | 142 | 11 |
|         |   |   |     |   |     |    | 82.1408 | L | Y | 86  | F | 115 | 30 |

|  |  |  |  |  |  |  |         |   |   |     |   |     |    |
|--|--|--|--|--|--|--|---------|---|---|-----|---|-----|----|
|  |  |  |  |  |  |  | 82.3517 | H | I | 379 | F | 406 | 28 |
|  |  |  |  |  |  |  | 82.5123 | L | S | 167 | C | 213 | 47 |
|  |  |  |  |  |  |  | 82.8535 | L | S | 161 | C | 213 | 53 |
|  |  |  |  |  |  |  | 83.243  | H | F | 407 | S | 428 | 22 |
|  |  |  |  |  |  |  | 83.5777 | L | S | 12  | L | 46  | 35 |
|  |  |  |  |  |  |  | 83.5777 | L | T | 72  | F | 83  | 12 |
|  |  |  |  |  |  |  | 83.8712 | H | V | 264 | G | 283 | 20 |
|  |  |  |  |  |  |  | 83.8712 | H | F | 407 | F | 425 | 19 |
|  |  |  |  |  |  |  | 84.0317 | L | Y | 36  | D | 70  | 35 |
|  |  |  |  |  |  |  | 84.3237 | H | T | 413 | K | 449 | 37 |
|  |  |  |  |  |  |  | 84.6498 | L | L | 47  | T | 74  | 28 |
|  |  |  |  |  |  |  | 85.0453 | H | T | 309 | C | 369 | 61 |
|  |  |  |  |  |  |  | 85.0453 | H | T | 309 | L | 367 | 59 |
|  |  |  |  |  |  |  | 85.2045 | L | L | 135 | E | 194 | 60 |
|  |  |  |  |  |  |  | 85.5982 | L | W | 50  | D | 82  | 33 |
|  |  |  |  |  |  |  | 85.7765 | H | Y | 409 | K | 449 | 41 |
|  |  |  |  |  |  |  | 86.0538 | H | T | 413 | G | 448 | 36 |
|  |  |  |  |  |  |  | 87.0462 | H | Y | 200 | F | 243 | 44 |
|  |  |  |  |  |  |  | 87.2253 | H | Y | 182 | L | 236 | 55 |
|  |  |  |  |  |  |  | 87.4913 | H | Y | 409 | G | 448 | 40 |
|  |  |  |  |  |  |  | 87.7194 | L | L | 47  | L | 73  | 27 |
|  |  |  |  |  |  |  | 88.5248 | L | T | 5   | L | 46  | 42 |

|  |  |  |  |  |  |  |         |   |   |     |   |     |    |
|--|--|--|--|--|--|--|---------|---|---|-----|---|-----|----|
|  |  |  |  |  |  |  | 88.5248 | L | Y | 36  | F | 71  | 36 |
|  |  |  |  |  |  |  | 88.687  | L | V | 132 | E | 160 | 29 |
|  |  |  |  |  |  |  | 88.9361 | H | V | 115 | L | 147 | 33 |
|  |  |  |  |  |  |  | 89.2455 | L | R | 95  | V | 131 | 37 |
|  |  |  |  |  |  |  | 90.3494 | L | Y | 94  | V | 131 | 38 |
|  |  |  |  |  |  |  | 90.8672 | L | Y | 91  | V | 131 | 41 |
|  |  |  |  |  |  |  | 91.059  | H | F | 407 | K | 449 | 43 |
|  |  |  |  |  |  |  | 91.374  | L | D | 1   | L | 46  | 46 |
|  |  |  |  |  |  |  | 91.5013 | L | Y | 87  | V | 131 | 45 |
|  |  |  |  |  |  |  | 92.2118 | H | V | 371 | L | 400 | 30 |
|  |  |  |  |  |  |  | 92.2118 | L | V | 132 | W | 147 | 16 |
|  |  |  |  |  |  |  | 92.637  | H | V | 371 | F | 406 | 36 |
|  |  |  |  |  |  |  | 93.1772 | L | L | 47  | D | 82  | 36 |
|  |  |  |  |  |  |  | 94.5832 | L | W | 50  | F | 83  | 34 |
|  |  |  |  |  |  |  | 94.5832 | H | V | 158 | L | 176 | 19 |
|  |  |  |  |  |  |  | 94.5832 | L | F | 71  | F | 83  | 13 |
|  |  |  |  |  |  |  | 94.7828 | H | L | 370 | F | 406 | 37 |
|  |  |  |  |  |  |  | 95.3685 | L | S | 12  | D | 70  | 59 |
|  |  |  |  |  |  |  | 96.8033 | L | Y | 36  | D | 82  | 47 |
|  |  |  |  |  |  |  | 97.4023 | H | V | 158 | L | 181 | 24 |
|  |  |  |  |  |  |  | 98.197  | H | Y | 200 | L | 253 | 54 |
|  |  |  |  |  |  |  | 98.7978 | L | R | 95  | L | 134 | 40 |

|  |  |  |  |  |  |  |         |   |   |     |   |     |    |
|--|--|--|--|--|--|--|---------|---|---|-----|---|-----|----|
|  |  |  |  |  |  |  | 99.2843 | H | N | 203 | M | 254 | 52 |
|  |  |  |  |  |  |  | 99.479  | L | Y | 94  | L | 134 | 41 |
|  |  |  |  |  |  |  | 100.058 | H | Y | 200 | M | 254 | 55 |
|  |  |  |  |  |  |  | 100.639 | L | L | 47  | F | 83  | 37 |
|  |  |  |  |  |  |  | 102.965 | H | V | 115 | T | 157 | 43 |
|  |  |  |  |  |  |  | 104.781 | H | V | 148 | L | 176 | 29 |
|  |  |  |  |  |  |  | 105.764 | H | V | 148 | L | 181 | 34 |
|  |  |  |  |  |  |  | 106.385 | H | L | 147 | L | 176 | 30 |
|  |  |  |  |  |  |  | 107.125 | H | L | 147 | L | 181 | 35 |
|  |  |  |  |  |  |  | 108.022 | H | V | 158 | T | 199 | 42 |
|  |  |  |  |  |  |  | 108.586 | H | G | 145 | L | 176 | 32 |
|  |  |  |  |  |  |  | 109.074 | H | G | 145 | L | 181 | 37 |
|  |  |  |  |  |  |  | 112.548 | H | V | 148 | T | 199 | 52 |
